# Supplementary material
Source: PubMed Central journal article supplement (PMC5933162)

**Supplemental Figure 1: Treatment with Fenretinide Did Not Alter the Weight of the Mice but Decreased the Total Weight of the Tissue Lesion**

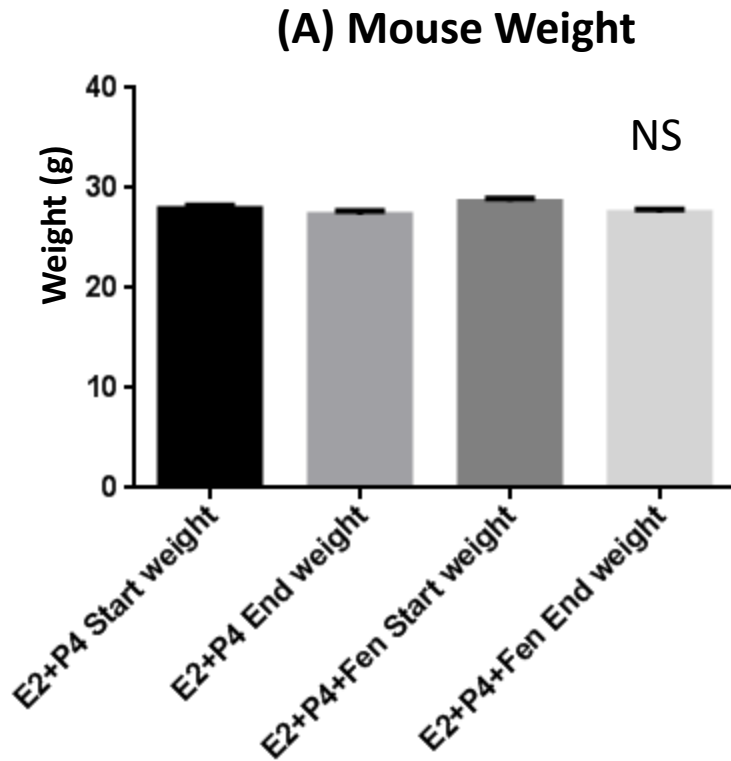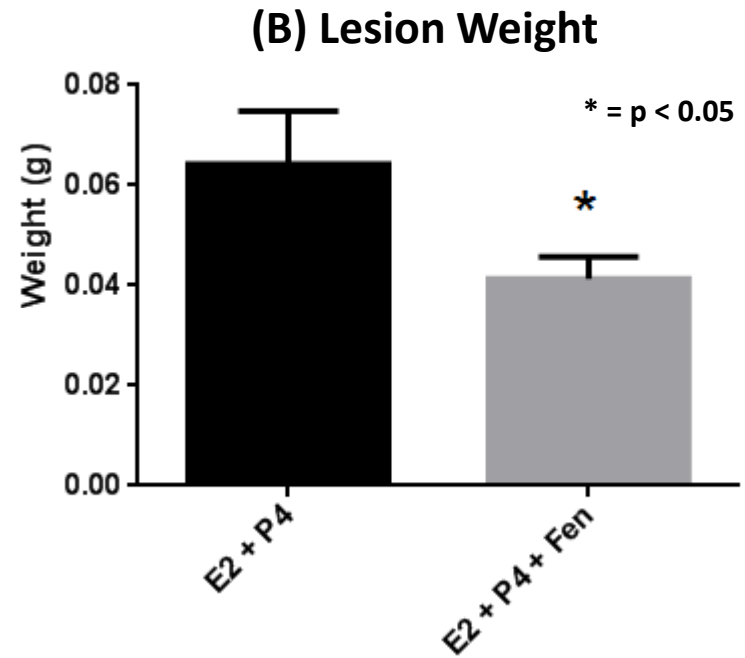

**Supplemental Figure 2: Fenretinide Increases Gene Expression of CRBP1, but this increase was not statistically significant**

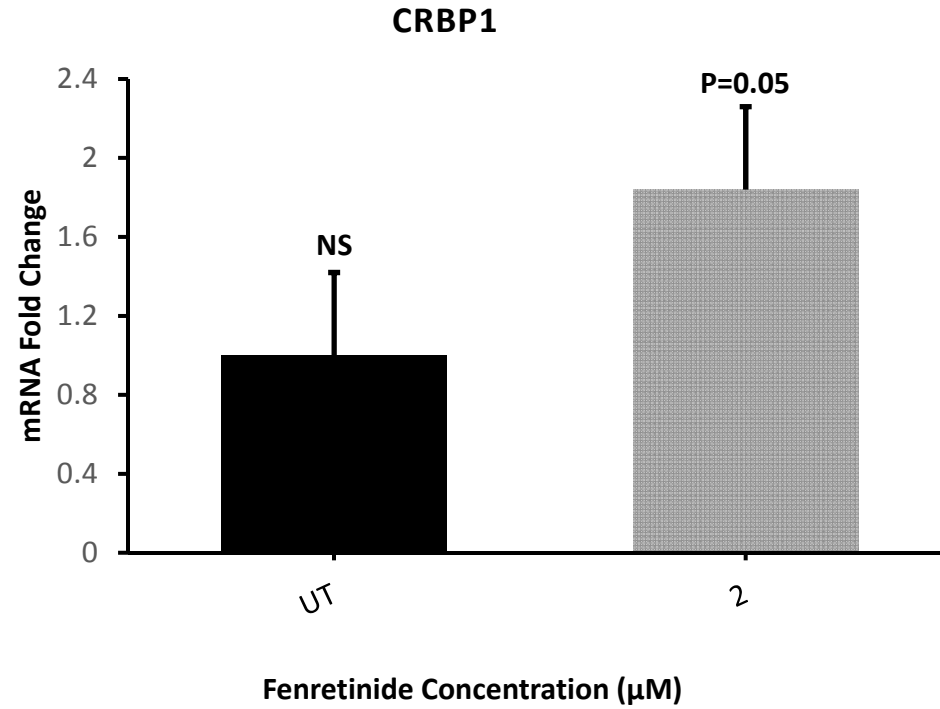

Supplement: suppl-figure-920.pdf [file suppl-figure-920.pdf]
